# Supplementary material for: Evidence of Antibiotic Resistance and Virulence Factors in Environmental Isolates of Vibrio Species
Source: MDPI journal article supplement (doi:10.3390/antibiotics12061062), 2023-06-16
Supplement: s1 [file s1]

**Table S1: Results of biochemical test assay of environment water samples isolates**

| Sample code                                                                                                                                                                                                                                                                                                | Biochemical assessment results of environmental water sample isolates |            |            |          |            |            |     |         |    |         |     |     |
|------------------------------------------------------------------------------------------------------------------------------------------------------------------------------------------------------------------------------------------------------------------------------------------------------------|-----------------------------------------------------------------------|------------|------------|----------|------------|------------|-----|---------|----|---------|-----|-----|
|                                                                                                                                                                                                                                                                                                            | Vog<br>.<br>Pro.                                                      | Arg<br>Utl | Slt<br>Tol | ON<br>PG | Ctr<br>Utl | Orn<br>Utl | Mnt | Ar<br>b | Su | Gl<br>u | Sln | Clb |
| V-Gan                                                                                                                                                                                                                                                                                                      | +                                                                     | +          | +          | +        | +          | +          | -   | -       | -  | -       | +   | -   |
| VH-I3                                                                                                                                                                                                                                                                                                      | +                                                                     | +          | +          | +        | -          | -          | -   | -       | -  | -       | -   | +   |
| VH-I4                                                                                                                                                                                                                                                                                                      | +                                                                     | +          | +          | +        | +          | +          | -   | -       | -  | -       | +   | -   |
| VH-II1                                                                                                                                                                                                                                                                                                     | -                                                                     | -          | +          | +        | +          | -          | -   | -       | -  | -       | -   | -   |
| VH-II2                                                                                                                                                                                                                                                                                                     | -                                                                     | -          | +          | +        | -          | -          | -   | +       | +  | +       | +   | +   |
| VH-II3                                                                                                                                                                                                                                                                                                     | -                                                                     | -          | +          | -        | +          | -          | -   | -       | -  | +       | -   | -   |
| VH-II4                                                                                                                                                                                                                                                                                                     | +                                                                     | +          | +          | +        | +          | +          | -   | -       | -  | -       | +   | -   |
| VHMC-A                                                                                                                                                                                                                                                                                                     | +                                                                     | +          | +          | +        | +          | +          | -   | -       | -  | +       | -   | -   |
| VHMC-B                                                                                                                                                                                                                                                                                                     | -                                                                     | -          | +          | +        | +          | +          | +   | +       | +  | +       | +   | +   |
| VHMC-C                                                                                                                                                                                                                                                                                                     | +                                                                     | +          | +          | +        | +          | +          | +   | +       | +  | +       | +   | +   |
| VHMC-D                                                                                                                                                                                                                                                                                                     | +                                                                     | +          | +          | +        | +          | +          | -   | -       | -  | +       | -   | +   |
| VHVB-I                                                                                                                                                                                                                                                                                                     | +                                                                     | +          | +          | +        | +          | +          | -   | -       | -  | -       | -   | +   |
| VHVB-II                                                                                                                                                                                                                                                                                                    | -                                                                     | -          | +          | +        | +          | -          | +   | +       | -  | +       | +   | +   |
| VR                                                                                                                                                                                                                                                                                                         | +                                                                     | +          | +          | +        | +          | +          | -   | -       | -  | -       | -   | +   |
| VM-IA                                                                                                                                                                                                                                                                                                      | -                                                                     | +          | +          | +        | +          | +          | -   | -       | -  | +       | -   | -   |
| VM-IB                                                                                                                                                                                                                                                                                                      | -                                                                     | +          | +          | +        | +          | +          | -   | -       | -  | -       | -   | +   |
| VM-IIA                                                                                                                                                                                                                                                                                                     | +                                                                     | +          | +          | +        | +          | +          | -   | -       | -  | +       | -   | -   |
| VM-IIB                                                                                                                                                                                                                                                                                                     | -                                                                     | -          | +          | +        | +          | +          | +   | -       | +  | +       | -   | +   |
| VP-IA                                                                                                                                                                                                                                                                                                      | +                                                                     | +          | +          | +        | +          | +          | -   | -       | -  | +       | -   | -   |
| VP-IB                                                                                                                                                                                                                                                                                                      | +                                                                     | +          | +          | +        | +          | +          | -   | -       | -  | -       | -   | +   |
| Vog Pros = Voges Proskauers, Arg Utl = Arginine Utilization, Slt Tlr = Salt tolerance<br>ONPG = Ortho Nitro Phenyl beta Galactosidase, Ctr Utl = Citrate Utilization, Orn utl<br>= Ornithine Utilization, Mnt = Mannitol, Arb = Arabinose, Su = Sucrose, Glu =<br>Glucose, Sln = Salicin, Clb = Cellobiose |                                                                       |            |            |          |            |            |     |         |    |         |     |     |

**Table S2: Antibiotic resistance and susceptibility assessment of each isolate**

| S/N | Isolates                       | Diameter of zone of inhibition (in mm) |     |     |     |         |     |     |     |          |     |         |     |         |     |
|-----|--------------------------------|----------------------------------------|-----|-----|-----|---------|-----|-----|-----|----------|-----|---------|-----|---------|-----|
|     |                                | AMP                                    | GEN | FZD | NA  | CH<br>L | TET | CEX | CTX | CPF<br>X | CMX | NO<br>R | STR | NE<br>O | PMB |
| 1   | <i>E. coli</i><br>DH5 $\alpha$ | 15                                     | 20  | 14  | 20  | 21      | 19  | 15  | 26  | 24       | 24  | 24      | 15  | 15      | 28  |
| 2   | VHVB-I                         | RES                                    | 24  | 15  | 25  | 25      | 28  | 31  | 05  | 28       | RES | 25      | 23  | ND      | ND  |
| 3   | VHVB-II                        | RES                                    | 17  | 11  | 26  | 25      | 18  | 15  | 34  | 25       | 16  | 22      | 16  | ND      | ND  |
| 4   | VH-I4                          | RES                                    | 19  | 15  | 30  | 16      | 20  | 06  | 29  | 26       | 19  | 25      | 15  | ND      | ND  |
| 5   | VH-I3                          | RES                                    | 28  | 14  | RES | 26      | 20  | RES | 22  | 20       | 16  | 20      | 20  | 21      | 22  |
| 6   | V-Gan                          | 07                                     | 15  | 11  | ND  | 19      | 17  | RES | 19  | 20       | 19  | 18      | RES | 15      | 15  |
| 7   | VH-II1                         | RES                                    | 20  | 10  | ND  | 27      | 20  | 08  | 34  | 25       | 17  | 24      | 19  | 19      | 12  |
| 8   | VH-II2                         | RES                                    | 20  | 13  | ND  | 26      | 28  | RES | 20  | 24       | 15  | 24      | 12  | 20      | 17  |
| 9   | VH-II3                         | 06                                     | 20  | 06  | ND  | 30      | 21  | 08  | 15  | 27       | 18  | 17      | 19  | 20      | 08  |
| 10  | VH-II4                         | 08                                     | 16  | 10  | ND  | 22      | 18  | ND  | ND  | ND       | ND  | ND      | ND  | 15      | 12  |
| 11  | VHMC-A                         | 16                                     | 24  | 20  | 28  | ND      | 19  | 20  | 34  | 32       | 30  | 30      | 20  | 20      | 16  |
| 12  | VHMC-B                         | RES                                    | 30  | 18  | RES | ND      | 20  | RES | 32  | 26       | RES | 20      | 20  | 22      | 22  |
| 13  | VHMC-C                         | RES                                    | 18  | 14  | 18  | ND      | 21  | 20  | 26  | 24       | RES | 20      | 16  | RES     | 14  |
| 14  | VHMC-D                         | RES                                    | 20  | RES | RES | ND      | 16  | RES | RES | 20       | RES | 22      | 14  | 20      | 16  |
| 15  | VR                             | RES                                    | 14  | 12  | 16  | 22      | 28  | 12  | 25  | 20       | 13  | 19      | 12  | 16      | 12  |
| 16  | VM-IA                          | 10                                     | 19  | 17  | RES | 19      | 22  | 12  | 22  | 17       | RES | 14      | 10  | 19      | 11  |
| 17  | VM-IB                          | RES                                    | 19  | 15  | 19  | 23      | 24  | RES | 20  | 25       | 19  | 20      | 15  | 17      | 13  |
| 18  | VM-IIA                         | 09                                     | 15  | 12  | RES | 22      | 18  | RES | 21  | 23       | 20  | 22      | 15  | 13      | 15  |
| 19  | VM-IIB                         | RES                                    | 19  | 13  | RES | 29      | 20  | 15  | 26  | 17       | RES | 15      | 16  | 16      | 10  |
| 20  | VP-IA                          | 11                                     | 12  | 13  | 20  | 20      | 26  | RES | 20  | 20       | 19  | 20      | 12  | 12      | 14  |
| 21  | VP-IB                          | RES                                    | 15  | 09  | 13  | 22      | 21  | RES | 13  | 25       | RES | 21      | 15  | 12      | 10  |

ND: Not determined      **RES**: Resistant

AMP: Ampicillin, GEN: Gentamycin, FZD: Furazolidone, NA: Nalidixic acid, CHL: Chloramphenicol, TET: Tetracycline, CEX: Cephalexin, CTX: Cefotaxime, CPFX: Ciprofloxacin, CMX: Co-trimoxazole, NOR: Norfloxacin, STR: Streptomycin, NEO: Neomycin, PMB: Polymyxin B

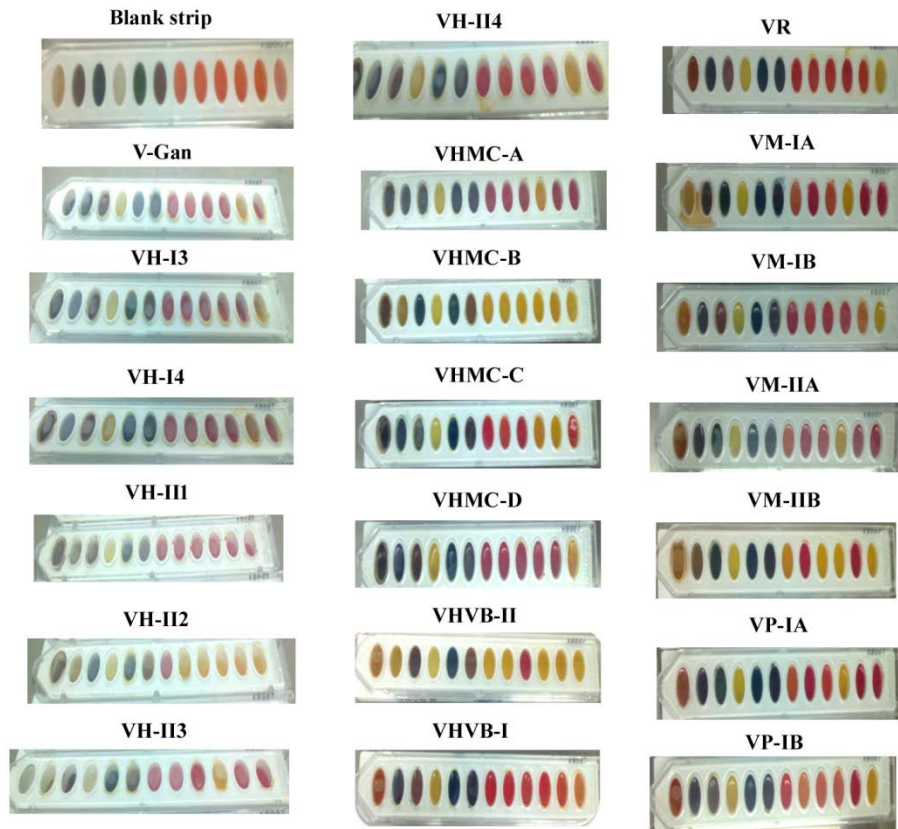

**Figure S1:** Result of biochemical test confirmation of each *Vibrio* isolates
